# Supplementary material
Source: ML conference proceedings conference paper supplement (https://openreview.net/forum?id=C6a0Obrp3o)
Supplement: supplementary_material [file attachment]

## Image-to-Text Inversion User Studies

1 Editing target: A woman with teal hair, in front of a pink wall. Reference :

| Options | Number | Ratio                      |
|---------|--------|----------------------------|
| 1       | 5      | <div><div></div></div> 20% |
| 2       | 5      | <div><div></div></div> 20% |
| 3       | 1      | <div><div></div></div> 4%  |
| 4       | 1      | <div><div></div></div> 4%  |
| 5       | 0      | <div><div></div></div> 0%  |
| 6       | 0      | <div><div></div></div> 0%  |
| 7       | 0      | <div><div></div></div> 0%  |
| 8       | 3      | <div><div></div></div> 12% |
| 9       | 10     | <div><div></div></div> 40% |
| sum     | 25     |                            |

2 Editing target: A man face funko pop. Reference :

| Options | Number | Ratio                      |
|---------|--------|----------------------------|
| 1       | 1      | <div><div></div></div> 4%  |
| 2       | 14     | <div><div></div></div> 56% |
| 3       | 2      | <div><div></div></div> 8%  |
| 4       | 0      | <div><div></div></div> 0%  |
| 5       | 0      | <div><div></div></div> 0%  |
| 6       | 4      | <div><div></div></div> 16% |
| 7       | 1      | <div><div></div></div> 4%  |
| 8       | 0      | <div><div></div></div> 0%  |
| 9       | 3      | <div><div></div></div> 12% |
| sum     | 25     |                            |

3 Editing target: An oil painting of a woman face in a wooden frame. Reference:

| Options | Number | Ratio                      |
|---------|--------|----------------------------|
| 1       | 1      | <div><div></div></div> 4%  |
| 2       | 1      | <div><div></div></div> 4%  |
| 3       | 5      | <div><div></div></div> 20% |
| 4       | 1      | <div><div></div></div> 4%  |
| 5       | 0      | <div><div></div></div> 0%  |
| 6       | 0      | <div><div></div></div> 0%  |
| 7       | 3      | <div><div></div></div> 12% |
| 8       | 11     | <div><div></div></div> 44% |
| 9       | 3      | <div><div></div></div> 12% |
| sum     | 25     |                            |

4 Editing target: A tattoo of a man's face on the back. Reference:

| Options | Number | Ratio                      |
|---------|--------|----------------------------|
| 1       | 0      | <div><div></div></div> 0%  |
| 2       | 0      | <div><div></div></div> 0%  |
| 3       | 0      | <div><div></div></div> 0%  |
| 4       | 6      | <div><div></div></div> 24% |
| 5       | 3      | <div><div></div></div> 12% |
| 6       | 9      | <div><div></div></div> 36% |
| 7       | 2      | <div><div></div></div> 8%  |
| 8       | 5      | <div><div></div></div> 20% |
| 9       | 0      | <div><div></div></div> 0%  |
| sum     | 25     |                            |

5 Editing target: A woman with red lipstick and purple eye shadow. Reference :

| Options | Number | Ratio                      |
|---------|--------|----------------------------|
| 1       | 6      | <div><div></div></div> 24% |
| 2       | 5      | <div><div></div></div> 20% |
| 3       | 0      | <div><div></div></div> 0%  |
| 4       | 8      | <div><div></div></div> 32% |
| 5       | 3      | <div><div></div></div> 12% |
| 6       | 1      | <div><div></div></div> 4%  |
| 7       | 0      | <div><div></div></div> 0%  |
| 8       | 2      | <div><div></div></div> 8%  |
| 9       | 0      | <div><div></div></div> 0%  |
| sum     | 25     |                            |

6 Editing target: A man with long hair, side view. Reference :

| Options | Number | Ratio                      |
|---------|--------|----------------------------|
| 1       | 5      | <div><div></div></div> 20% |
| 2       | 1      | <div><div></div></div> 4%  |
| 3       | 1      | <div><div></div></div> 4%  |
| 4       | 0      | <div><div></div></div> 0%  |
| 5       | 0      | <div><div></div></div> 0%  |
| 6       | 0      | <div><div></div></div> 0%  |
| 7       | 2      | <div><div></div></div> 8%  |
| 8       | 0      | <div><div></div></div> 0%  |
| 9       | 16     | <div><div></div></div> 64% |
| sum     | 25     |                            |

7 Editing target: A woman wearing nurse uniform. Reference :

| Options | Number | Ratio                      |
|---------|--------|----------------------------|
| 1       | 6      | <div><div></div></div> 24% |
| 2       | 9      | <div><div></div></div> 36% |
| 3       | 2      | <div><div></div></div> 8%  |
| 4       | 5      | <div><div></div></div> 20% |
| 5       | 0      | <div><div></div></div> 0%  |
| 6       | 1      | <div><div></div></div> 4%  |
| 7       | 0      | <div><div></div></div> 0%  |
| 8       | 1      | <div><div></div></div> 4%  |
| 9       | 1      | <div><div></div></div> 4%  |
| sum     | 25     |                            |

8 Editing target: A man face on a metal coin. Reference :

| Options | Number | Ratio                      |
|---------|--------|----------------------------|
| 1       | 0      | <div><div></div></div> 0%  |
| 2       | 17     | <div><div></div></div> 68% |
| 3       | 0      | <div><div></div></div> 0%  |
| 4       | 0      | <div><div></div></div> 0%  |
| 5       | 0      | <div><div></div></div> 0%  |
| 6       | 0      | <div><div></div></div> 0%  |
| 7       | 0      | <div><div></div></div> 0%  |
| 8       | 4      | <div><div></div></div> 16% |
| 9       | 4      | <div><div></div></div> 16% |
| sum     | 25     |                            |

9 Editing target: A woman as a WNBA player. Reference :

| Options | Number | Ratio                      |
|---------|--------|----------------------------|
| 1       | 1      | <div><div></div></div> 4%  |
| 2       | 0      | <div><div></div></div> 0%  |
| 3       | 0      | <div><div></div></div> 0%  |
| 4       | 8      | <div><div></div></div> 32% |
| 5       | 0      | <div><div></div></div> 0%  |
| 6       | 2      | <div><div></div></div> 8%  |
| 7       | 0      | <div><div></div></div> 0%  |
| 8       | 1      | <div><div></div></div> 4%  |
| 9       | 13     | <div><div></div></div> 52% |
| sum     | 25     |                            |

10 Editing target: A man wearing sunglasses and a green helmet. Reference :

| Options | Number | Ratio                      |
|---------|--------|----------------------------|
| 1       | 4      | <div><div></div></div> 16% |
| 2       | 0      | <div><div></div></div> 0%  |
| 3       | 0      | <div><div></div></div> 0%  |
| 4       | 0      | <div><div></div></div> 0%  |
| 5       | 15     | <div><div></div></div> 60% |
| 6       | 0      | <div><div></div></div> 0%  |
| 7       | 0      | <div><div></div></div> 0%  |
| 8       | 2      | <div><div></div></div> 8%  |
| 9       | 4      | <div><div></div></div> 16% |
| sum     | 25     |                            |

11 Editing target: A toy on the sofa. Reference :

| Options | Number | Ratio                      |
|---------|--------|----------------------------|
| 1       | 0      | <div><div></div></div> 0%  |
| 2       | 5      | <div><div></div></div> 20% |
| 3       | 0      | <div><div></div></div> 0%  |
| 4       | 1      | <div><div></div></div> 4%  |
| 5       | 17     | <div><div></div></div> 68% |
| 6       | 2      | <div><div></div></div> 8%  |
| 7       | 0      | <div><div></div></div> 0%  |
| 8       | 0      | <div><div></div></div> 0%  |
| sum     | 25     |                            |

12 Editing target: A dog swimming in the pool. Reference :

| Options | Number | Ratio                      |
|---------|--------|----------------------------|
| 1       | 7      | <div><div></div></div> 28% |
| 2       | 0      | <div><div></div></div> 0%  |
| 3       | 6      | <div><div></div></div> 24% |
| 4       | 0      | <div><div></div></div> 0%  |
| 5       | 7      | <div><div></div></div> 28% |
| 6       | 1      | <div><div></div></div> 4%  |
| 7       | 1      | <div><div></div></div> 4%  |
| 8       | 3      | <div><div></div></div> 12% |
| sum     | 25     |                            |

13 Editing target: A pair of boots. Reference :

| Options | Number | Ratio                      |
|---------|--------|----------------------------|
| 1       | 3      | <div><div></div></div> 12% |

|     |    |                            |
|-----|----|----------------------------|
| 2   | 2  | <div><div></div></div> 8%  |
| 3   | 0  | <div><div></div></div> 0%  |
| 4   | 19 | <div><div></div></div> 76% |
| 5   | 0  | <div><div></div></div> 0%  |
| 6   | 0  | <div><div></div></div> 0%  |
| 7   | 1  | <div><div></div></div> 4%  |
| 8   | 0  | <div><div></div></div> 0%  |
| sum | 25 |                            |

14 Editing target: A cat walking on the road. Reference:

| Options | Number | Ratio                      |
|---------|--------|----------------------------|
| 1       | 0      | <div><div></div></div> 0%  |
| 2       | 19     | <div><div></div></div> 76% |
| 3       | 0      | <div><div></div></div> 0%  |
| 4       | 1      | <div><div></div></div> 4%  |
| 5       | 0      | <div><div></div></div> 0%  |
| 6       | 3      | <div><div></div></div> 12% |
| 7       | 1      | <div><div></div></div> 4%  |
| 8       | 1      | <div><div></div></div> 4%  |
| sum     | 25     |                            |

15 Editing target: Taylor Swift with this hair. Reference:

| Options | Number | Ratio                      |
|---------|--------|----------------------------|
| 1       | 3      | <div><div></div></div> 12% |
| 2       | 0      | <div><div></div></div> 0%  |
| 3       | 0      | <div><div></div></div> 0%  |

|     |    |                            |
|-----|----|----------------------------|
| 4   | 0  | <div><div></div></div> 0%  |
| 5   | 1  | <div><div></div></div> 4%  |
| 6   | 17 | <div><div></div></div> 68% |
| 7   | 3  | <div><div></div></div> 12% |
| 8   | 1  | <div><div></div></div> 4%  |
| sum | 25 |                            |

16 Editing target: Gal Gadot wearing that clothes. Reference:

| Options | Number | Ratio                      |
|---------|--------|----------------------------|
| 1       | 0      | <div><div></div></div> 0%  |
| 2       | 0      | <div><div></div></div> 0%  |
| 3       | 18     | <div><div></div></div> 72% |
| 4       | 0      | <div><div></div></div> 0%  |
| 5       | 0      | <div><div></div></div> 0%  |
| 6       | 2      | <div><div></div></div> 8%  |
| 7       | 2      | <div><div></div></div> 8%  |
| 8       | 3      | <div><div></div></div> 12% |
| sum     | 25     |                            |

17 Editing target: A dog running on the road. Reference:

| Options | Number | Ratio                      |
|---------|--------|----------------------------|
| 1       | 13     | <div><div></div></div> 52% |
| 2       | 4      | <div><div></div></div> 16% |
| 3       | 0      | <div><div></div></div> 0%  |
| 4       | 0      | <div><div></div></div> 0%  |
| 5       | 0      | <div><div></div></div> 0%  |



|     |    |                            |
|-----|----|----------------------------|
| 6   | 2  | <div><div></div></div> 8%  |
| 7   | 1  | <div><div></div></div> 4%  |
| 8   | 5  | <div><div></div></div> 20% |
| sum | 25 |                            |

18 Editing target: A vase on the beach with roses in it. Reference:

| Options | Number | Ratio                      |
|---------|--------|----------------------------|
| 1       | 0      | <div><div></div></div> 0%  |
| 2       | 0      | <div><div></div></div> 0%  |
| 3       | 1      | <div><div></div></div> 4%  |
| 4       | 1      | <div><div></div></div> 4%  |
| 5       | 1      | <div><div></div></div> 4%  |
| 6       | 19     | <div><div></div></div> 76% |
| 7       | 3      | <div><div></div></div> 12% |
| 8       | 0      | <div><div></div></div> 0%  |
| sum     | 25     |                            |

19 Editing target: A girl wearing that backpack. Reference:

| Options | Number | Ratio                      |
|---------|--------|----------------------------|
| 1       | 0      | <div><div></div></div> 0%  |
| 2       | 21     | <div><div></div></div> 84% |
| 3       | 1      | <div><div></div></div> 4%  |
| 4       | 0      | <div><div></div></div> 0%  |
| 5       | 0      | <div><div></div></div> 0%  |
| 6       | 1      | <div><div></div></div> 4%  |
| 7       | 0      | <div><div></div></div> 0%  |

|     |    |                           |
|-----|----|---------------------------|
| 8   | 2  | <div><div></div></div> 8% |
| sum | 25 |                           |

20 Editing target: A clock on the table showing twelve o'clock. Reference :

| Options | Number | Ratio                      |
|---------|--------|----------------------------|
| 1       | 0      | <div><div></div></div> 0%  |
| 2       | 0      | <div><div></div></div> 0%  |
| 3       | 0      | <div><div></div></div> 0%  |
| 4       | 0      | <div><div></div></div> 0%  |
| 5       | 4      | <div><div></div></div> 16% |
| 6       | 1      | <div><div></div></div> 4%  |
| 7       | 20     | <div><div></div></div> 80% |
| 8       | 0      | <div><div></div></div> 0%  |
| sum     | 25     |                            |
