# Supplementary material
Source: ML conference proceedings conference paper supplement (https://openreview.net/forum?id=C6a0Obrp3o)
Supplement: supplementary_material [file attachment]

| Index<br>(face)   | TI | DB | TI+DB | Custom | Elite | BreakAScene | FastComposer | Ours<br>Stage<br>I | Ours<br>Stage<br>II |
|-------------------|----|----|-------|--------|-------|-------------|--------------|--------------------|---------------------|
| 1                 | 6  | 2  | 1     | 3      | 5     | 4           | 8            | 7                  | 9                   |
| 2                 | 5  | 3  | 8     | 4      | 9     | 7           | 1            | 2                  | 6                   |
| 3                 | 6  | 4  | 2     | 9      | 5     | 1           | 8            | 3                  | 7                   |
| 4                 | 2  | 9  | 7     | 8      | 3     | 4           | 1            | 6                  | 5                   |
| 5                 | 8  | 9  | 5     | 2      | 7     | 6           | 1            | 3                  | 4                   |
| 6                 | 4  | 6  | 3     | 5      | 7     | 8           | 2            | 1                  | 9                   |
| 7                 | 1  | 8  | 9     | 6      | 7     | 5           | 4            | 3                  | 2                   |
| 8                 | 5  | 7  | 3     | 6      | 4     | 1           | 8            | 9                  | 2                   |
| 9                 | 6  | 3  | 8     | 1      | 2     | 5           | 4            | 7                  | 9                   |
| 10                | 7  | 4  | 6     | 9      | 2     | 1           | 3            | 8                  | 5                   |
| Index<br>(others) | TI | DB | TI+DB | Custom | Elite | BreakAScene | \            | Ours<br>Stage<br>I | Ours<br>Stage<br>II |
| 1                 | 1  | 7  | 8     | 2      | 3     | 4           | \            | 6                  | 5                   |
| 2                 | 2  | 5  | 8     | 7      | 1     | 4           | \            | 6                  | 3                   |
| 3                 | 3  | 8  | 7     | 5      | 6     | 2           | \            | 1                  | 4                   |
| 4                 | 8  | 1  | 7     | 3      | 5     | 4           | \            | 2                  | 6                   |
| 5                 | 8  | 3  | 4     | 2      | 5     | 7           | \            | 1                  | 6                   |
| 6                 | 5  | 7  | 4     | 1      | 6     | 2           | \            | 8                  | 3                   |
| 7                 | 6  | 3  | 8     | 7      | 4     | 5           | \            | 2                  | 1                   |
| 8                 | 4  | 1  | 3     | 5      | 7     | 2           | \            | 8                  | 6                   |
| 9                 | 4  | 1  | 7     | 8      | 5     | 3           | \            | 6                  | 2                   |
| 10                | 8  | 4  | 2     | 1      | 3     | 6           | \            | 5                  | 7                   |
